# Supplementary material
Source: PubMed Central journal article supplement (PMC1860901)
Supplement: heart_hrt.2005.066936_1.pdf [file heart_hrt.2005.066936_1.pdf]

Table 1 Endothelial dysfunction in coronary circulation and clinical outcome

D

| Author                                 | Patients                                          | Study type and            |                                                          | Predictive value |
|----------------------------------------|---------------------------------------------------|---------------------------|----------------------------------------------------------|------------------|
|                                        |                                                   | duration                  | Outcome studied                                          |                  |
| Suwaidi <i>et al</i> <sup>w1</sup>     | 157 patients with mild CAD                        | Retrospective (28 months) | Cardiac death, MI, CHF, CABG, PCI                        | +                |
| Schachinger <i>et al</i> <sup>w2</sup> | 147 patients with CAD                             | Retrospective (7.7 years) | MI, UA, ischaemic stroke, CABG, PTCA, peripheral bypass  | +                |
| Hollenberg <i>et al</i> <sup>w3</sup>  | 73 orthotopic heart transplant recipients         | Prospective (32 months)   | Cardiac death, cardiac allograft vasculopathy            | +                |
| Halcox <i>et al</i> <sup>w4</sup>      | 308 patients referred for cardiac catheterisation | Retrospective (46 months) | CVD death, MI, ischaemic stroke, UA                      | +                |
| Targonski <i>et al</i> <sup>w5</sup>   | 503 patients without angiographic CAD             | Retrospective (90 months) | Cerebrovascular events                                   | +                |
| Schindler <i>et al</i> <sup>w6</sup>   | 130 patients with normal coronary angiograms      | Prospective (45 months)   | CVD death, UA, MI, PTCA, CABG, stroke, peripheral bypass | +                |

CABG, coronary artery bypass graft surgery; CAD, coronary artery disease; CHF, congestive heart failure; CVD, cardiovascular disease; MI, myocardial infarction; PCI, percutaneous coronary intervention; PTCA, percutaneous transluminal coronary angioplasty; UA, unstable angina; +, independent predictor.

Table 2 Endothelial dysfunction in peripheral circulation and clinical outcome

D

| <b>Author</b>                        | <b>Patients</b>                             | <b>Study type<br/>and duration</b> | <b>Outcome studied</b>                             | <b>Predictive<br/>value</b> |
|--------------------------------------|---------------------------------------------|------------------------------------|----------------------------------------------------|-----------------------------|
| Neunteufl <i>et al</i> <sup>w7</sup> | 73 patients with CAD                        | Retrospective<br>(5 years)         | Death, MI, PTCA, CABG                              | +                           |
| Heitzer <i>et al</i> <sup>18</sup>   | 281 patients with CAD                       | Prospective<br>(4.5 years)         | CVD, stroke, MI, CABG, PTCA,<br>peripheral bypass  | +                           |
| Perticone <i>et al</i> <sup>17</sup> | 225 patients with<br>hypertension           | Prospective<br>(32 months)         | CVD death, MI, stroke, TIA, UA,<br>CABG, PTCA, PVD | +                           |
| Gokce <i>et al</i> <sup>w8</sup>     | 187 patients undergoing<br>vascular surgery | Prospective<br>(30 months)         | CVD death, MI, UA, stroke                          | +                           |
| Modena <i>et</i>                     | 400 hypertensive                            | Prospective                        | CVD event                                          | +                           |

| Author                               | Patients                                 | Study type              |                                                                                    | Predictive value |
|--------------------------------------|------------------------------------------|-------------------------|------------------------------------------------------------------------------------|------------------|
|                                      |                                          | and duration            | Outcome studied                                                                    |                  |
| <i>al</i> <sup>w9</sup>              | postmenopausal women                     | (67 months)             |                                                                                    |                  |
| Gokce <i>et al</i> <sup>w10</sup>    | 199 patients undergoing vascular surgery | Prospective (1.2 years) | CVD death, MI, UA, stroke                                                          | +                |
| Brevetti <i>et al</i> <sup>w11</sup> | 131 patients with PVD                    | Prospective 23 months   | CVD death, MI, coronary revascularisation, UA, stroke, TIA                         | +                |
| Chan <i>et al</i> <sup>w12</sup>     | 152 coronary patients                    | Prospective 34 months   | CVD death, MI, coronary revascularisation, UA, stroke, TIA, carotid endarterectomy | +                |
| Fathi <i>et al</i> <sup>w13</sup>    | 444 patients at risk of coronary events  | Prospective 24 months   | Cardiovascular death, MI, stroke, revascularisation                                | -                |

PVD, peripheral vascular disease; TIA, transient ischemic attack; -, not an independent predictor of events.

Table 3 Relation of interleukin 6, myeloperoxidase, and CD40 with cardiovascular risk

D

| <b>Inflammatory</b> |                                                                                                                                                                                                                      |
|---------------------|----------------------------------------------------------------------------------------------------------------------------------------------------------------------------------------------------------------------|
| <b>biomarker</b>    | <b>Predictive value</b>                                                                                                                                                                                              |
| Interleukin 6       | Early marker for outcome in acute ischemic stroke <sup>w14</sup><br>Adverse in hospital prognosis in patients with acute coronary syndrome <sup>w15</sup><br>Increased mortality in unstable CAD <sup>w16, w17</sup> |
| Myeloperoxidase     | Increased risk for cardiovascular events <sup>w18, w19</sup>                                                                                                                                                         |
| CD40                | Risk of recurrent cardiovascular events <sup>w20, w21</sup><br>Independent increased risk of major cardiovascular events <sup>w18, w22</sup>                                                                         |

Table 4 Cohort studies examining the relation between C reactive protein and CVD

D

| <b>Author</b>                       | <b>No of patients (age range (years))</b> | <b>Follow up (years)</b> | <b>End point measured</b>   | <b>Predictive value</b> |
|-------------------------------------|-------------------------------------------|--------------------------|-----------------------------|-------------------------|
| Agewall <i>et al</i> <sup>w23</sup> | 131 (56–77)                               | 3                        | Fatal and non-fatal MI, SCD | +                       |
| Koenig <i>et al</i> <sup>w24</sup>  | 936 (45–64)                               | 8.2                      | Fatal or non-fatal acute MI | +                       |
| Jager <i>et al</i> <sup>w25</sup>   | 631 (50–70)                               | 5                        | CVD death, ICD              | +                       |
| Ridker <i>et al</i> <sup>w26</sup>  | 5742 (45–73)                              | 5                        | Non-fatal MI, UA, SCD       | +                       |

| <b>Author</b>                       | <b>No of patients (age range (years))</b> | <b>Follow up (years)</b> | <b>End point measured</b>                      | <b>Predictive value</b> |
|-------------------------------------|-------------------------------------------|--------------------------|------------------------------------------------|-------------------------|
| Rost <i>et al</i> <sup>w27</sup>    | 1462 (59–91)                              | 12–14                    | First ischemic stroke, TIA                     | +                       |
| Harris <i>et al</i> <sup>w17</sup>  | 675 (>65)                                 | 4.6                      | CVD death, ICD                                 | –                       |
| Mendall <i>et al</i> <sup>w28</sup> | 1239 (45–59)                              | 13.7                     | First fatal or non-fatal IHD                   | –                       |
| Lowe <i>et al</i> <sup>w29</sup>    | 1595 (49–67)                              | 6.25                     | First fatal or non-fatal IHD                   | –                       |
| Piro <i>et al</i> <sup>w30</sup>    | 2037 (35–64)                              | 5.2                      | Angina, CI, non-fatal MI, coronary death       | –                       |
| Strandberg <sup>w31</sup>           | 455 (75–85)                               | 10                       | CVD death                                      | –                       |
| Kistorp <i>et al</i> <sup>w32</sup> | 764 (50–89)                               | 5                        | CVD death and first major cardiovascular event | –                       |

CI, coronary insufficiency; ICD, implantable cardioverter defibrillator; IHD, ischaemic heart disease; SCD, sudden cardiac death.

Table 5 Nested case control studies examining the relation between C reactive protein and CVD

D

| <b>Author</b> | <b>Study population/age (years)</b> | <b>Follow-up (years)</b> | <b>End point</b> | <b>Predictive value</b> |
|---------------|-------------------------------------|--------------------------|------------------|-------------------------|
|---------------|-------------------------------------|--------------------------|------------------|-------------------------|

| Author                                | Study population/age       | Follow-up | End point                             | Predictive |
|---------------------------------------|----------------------------|-----------|---------------------------------------|------------|
|                                       | (years)                    | (years)   |                                       | value      |
| Albert <i>et al</i> <sup>w33</sup>    | 289 (97 men cases) 40–84   | 17        | SCD                                   | +          |
| Danesh <i>et al</i> <sup>w34</sup>    | 1531 (506 men cases) 40–59 | 9.5       | Fatal CHD, non-fatal MI               | +          |
| Folsom <i>et al</i> <sup>w35</sup>    | 1205 (615 cases) 45–64     | 3.6–4.3   | MI, CHD, death ,<br>revascularisation | +          |
| Gram <i>et al</i> <sup>w36</sup>      | 391 (133 cases) >40        | 7–15      | MI, CHD                               | –          |
| Gusseklou <i>et al</i> <sup>w37</sup> | 163 (80 cases) >85         | <5        | Stroke death                          | +          |
| Kervinen <i>et al</i> <sup>w38</sup>  | 300 (150 cases) 40–55      | <17       | MI or coronary death                  | +          |
| Kuller <i>et al</i> <sup>w39</sup>    | 444 (148 cases) 35–57      | <17       | CHD death                             | +          |
| Roivainen <i>et al</i> <sup>w40</sup> | 430 (215 cases) 48         | <8.5      | MI or coronary death                  | +          |

| Author                                     | Study population/age                         | Follow-up | End point                            | Predictive value |
|--------------------------------------------|----------------------------------------------|-----------|--------------------------------------|------------------|
|                                            | (years)                                      | (years)   |                                      |                  |
| Packard <i>et al</i> <sup>w41</sup>        | 1740 (580 cases) 56.8<br>(5.2)               | <6        | Fatal CHD, non-fatal MI              | +                |
| Ridker <i>et al</i> <sup>35</sup>          | 789 (246 men cases) 40–<br>84                | <14       | MI                                   | +                |
|                                            | 697 (154 men cases) 40–<br>84                |           | Ischaemic stroke                     |                  |
| Ridker <i>et al</i> <sup>w42,</sup><br>w43 | 366 (122 women cases)<br>59.3 (8.4)          | <3        | MI, stroke, PTCA,<br>CABG, CVD death | +                |
| Sakkinen <i>et al</i> <sup>w44</sup>       | 1717 (369 men cases)<br>45–68                | 20        | MI                                   | +                |
| Tice <i>et al</i> <sup>w45</sup>           | 394 (52 women cases)<br>>65                  | 6         | CVD death                            | +                |
| Tracy <i>et al</i> <sup>w46</sup>          | 292 (146 cases) >65<br>382 (237 cases) 65–79 | <3        | MI, AP, CHD death                    | –                |

AP, angina pectoris; CHD, coronary heart disease.
